# Supplementary material
Source: PubMed Central journal article supplement (PMC4818264)
Supplement: 15_096_Marques_Suppl.pdf [file 15_096_Marques_Suppl.pdf]

## Supplemental Data

# Signatures of miR-181a on the Renal Transcriptome and Blood Pressure

Francine Z Marques,<sup>1</sup> Simon PR Romaine,<sup>2</sup> Matthew Denniff,<sup>2</sup> James Eales,<sup>2</sup> John Dormer,<sup>3</sup> Ingrid M Garrelds,<sup>4</sup> Lukasz Wojnar,<sup>5</sup> Katarzyna Musialik,<sup>6</sup> Barbara Duda-Raszewska,<sup>7</sup> Bartłomiej Kiszka,<sup>7</sup> Magdalena Duda,<sup>7</sup> Brian J Morris,<sup>8</sup> Nilesh J Samani,<sup>2,9</sup> AH Jan Danser,<sup>4</sup> Pawel Bogdanski,<sup>6</sup> Ewa Zukowska-Szczechowska,<sup>7</sup> Fadi J Charchar,<sup>1</sup> and Maciej Tomaszewski<sup>2,10</sup>

Online address: <http://www.molmed.org>

The Feinstein Institute  
for Medical Research   
Empowering Imagination. Pioneering Discovery.®

### SUPPLEMENTARY METHODS

#### Subjects

Human kidney samples were collected during the TRANScriptome of renal human TissueE (TRANSLATE) Study (1). In brief, samples were obtained after surgery in 200 patients who underwent elective unilateral nephrectomy because of non-invasive renal cancer in one of three nephrology-urology centres [Silesian Renal Tissue Bank (2, 3), TRANSLATE P (recruitment conducted in Western Poland) and TRANSLATE Z (recruitment conducted in Southern Poland) (1)]. Each subject underwent standardized clinical phenotyping, including personal history (through anonymous coded questionnaires), anthropometry (i.e. weight, height) and triplicate measurements of blood pressure (BP) using a mercury sphygmomanometer (in a subset of samples – Silesian Renal Tissue Bank) (2, 3) or automatic digital BP monitoring (in the rest of the patients). Hypertension was diagnosed based on the criteria used previously (4, 5). All individuals were of white-European ancestry.

Serum samples from 200 subjects recruited in the Genetic Regulation of Arterial Pressure of Humans In the Community (GRAPHIC) Study were obtained for the replication experiment. Details of recruitment and phenotyping of GRAPHIC are described elsewhere (6, 7). Briefly, 520

nuclear families of white-European ancestry, with both parents aged 40–60 years and two adult offspring aged  $\geq 18$  years were identified through general practice records in Leicestershire, UK. All subjects ( $n = 2,037$ ) were extensively phenotyped including both clinic BP (calculated as a mean of the second and third of three readings) and 24-h ambulatory BP (7). The subset of 199 subjects obtained for the present replication cohort were selected from the parental generation of the GRAPHIC cohort ( $n = 1,032$ ) after the following initial exclusions: poor quality phenotype or genotype data ( $n = 9$ ); on antihypertensive or lipid-lowering medication ( $n = 150$ ); serum sample missing ( $n = 30$ ) or low volume ( $n = 4$ ). Following these exclusions, from amongst eligible subjects, 200 were selected on the basis of sex and extremes of mean 24-h ambulatory systolic BP. Thus, 100 men with the 50 highest and lowest values for mean 24-h ambulatory systolic BP were included in the replication sample, along with 100 women using the same criteria. One subject was further excluded due to a failure of RNA extraction leaving 199 included in the statistical analyses. No patients were receiving heparin and just six were receiving antiplatelet therapy.

All subjects gave written informed consent and the studies were approved by ethics committees at each institution.

#### Renal Tissue, Serum Processing and RNA Extraction

The renal tissue samples in the TRANSLATE Study were collected immediately after nephrectomy from a healthy (unaffected by cancer) pole of the kidney and immersed in RNAlater (Life Technologies) before storage at  $-80^{\circ}\text{C}$ , as previously described (1-3, 8). RNA was extracted from all kidney tissues using the miRNeasy kit (Qiagen) and stored at  $-80^{\circ}\text{C}$ . RNA was also extracted from 100  $\mu\text{l}$  (TRANSLATE) or 200  $\mu\text{l}$  (GRAPHIC) of serum (secured from blood collected during recruitment and stored at  $-80^{\circ}\text{C}$ ) using the miRNeasy Serum/Plasma kit (Qiagen) from matching subjects. No pooling of samples was performed.

#### Quantitative Real-time PCR (qPCR)

The first-strand complementary synthesis reaction (cDNA) was performed using the High Capacity Reverse Transcriptase cDNA Synthesis kit (Life Technologies) for mRNA and the TaqMan<sup>®</sup> MicroRNA Reverse Transcription kit (Life Technologies) for miRNAs. Amplification reactions used the TaqMan<sup>®</sup> Fast Advanced Master Mix (Life Technologies) in a Viia7<sup>™</sup> qPCR system (Life Technologies). TaqMan<sup>®</sup> assays were used to measure mRNA and miRNA expression (Supplemental Table S1) following the cycling conditions recommended by the supplier.  $\beta$ -actin (*ACTB*) mRNA

**Supplementary Table S1.** TaqMan® assays used to measure mRNA and microRNA expression.

| Official symbol   | TaqMan assay ID | Tissue       | Comments          | Study              |
|-------------------|-----------------|--------------|-------------------|--------------------|
| ACTB (NM_001101)  | Hs01060665_g1   | Kidney       | Housekeeping gene | TRANSLATE          |
| REN (NM_000537.3) | Hs00982555_m1   | Kidney       | Renin mRNA        | TRANSLATE          |
| RNU6              | 1973            | Kidney       | Housekeeping gene | TRANSLATE          |
| cel-miR-39        | 0200            | Serum        | Spike-in control  | TRANSLATE, GRAPHIC |
| hsa-miR-181a      | 0480            | Kidney/Serum | microRNA          | TRANSLATE, GRAPHIC |

**Supplementary Table S2.** Locked nucleic acid (LNA) probes used for *in situ* hybridization of microRNA staining.

| miRNA/<br>Probe name | Details           | Antiparallel sequence   | RNA<br>Tm | %LNA | Concentration |
|----------------------|-------------------|-------------------------|-----------|------|---------------|
| miR-181a             | miRNA of interest | ACTCACCGACAGCGTTGAATGTT | 85        | 23   | 50 nM         |
| miR-126              | Positive control  | CATTATTACTCACGGTACGA    | 84        | 20   | 20 nM         |
| Scramble             | Negative control  | TGTAACACGTCTATACGCCCA   | 87        | 21   | 20 nM         |

Tm, melting temperature.

**Supplementary Table S3.** Clinical characteristics of individuals in the TRANScriptome of renal humAn TissuE (TRANSLATE) Study, displayed per recruitment centre.

| Variable                   | SRTB         | TRANSLATE P  | TRANSLATE Z  |
|----------------------------|--------------|--------------|--------------|
| N                          | 67           | 80           | 53           |
| Age (years)                | 58.9 (11.3)  | 63.1 (10.0)  | 62.9 (10.1)  |
| BMI (kg/m <sup>2</sup> )   | 27.7 (4.3)   | 27.4 (4.3)   | 27.9 (4.1)   |
| Male sex                   | 37 (55.2%)   | 52 (65.0%)   | 31 (58.5%)   |
| SBP (mmHg)                 | 134.4 (12.1) | 142.6 (12.9) | 129.1 (11.3) |
| DBP (mmHg)                 | 82.0 (7.8)   | 88.2 (6.7)   | 75.6 (6.9)   |
| Hypertension               | 43 (64.2%)   | 55 (68.8%)   | 36 (67.9)    |
| Antihypertensive treatment | 40 (59.7%)   | 39 (48.8%)   | 35 (66.0%)   |

Data are shown as means and standard deviations or numbers and percentages.

N, number of individuals; SRTB, Silesian Renal Tissue Bank; BMI, body mass index; SBP, systolic blood pressure; DBP, diastolic blood pressure.

**Supplementary Table S4.** Basic demographic characteristics of TCGA individuals included in next-generation RNA-sequencing analysis of renal transcriptomes.

| Phenotype   | Values    |
|-------------|-----------|
| N           | 69        |
| Age (years) | 63.0±12.0 |
| Male sex    | 50 (72%)  |

Data are means and standard deviations or counts and percentages.

**Supplementary Table S5.** Association between blood pressure and the expression of renin mRNA in the kidney.

|                         | Systolic blood pressure | Diastolic blood pressure |
|-------------------------|-------------------------|--------------------------|
| Kidney renin mRNA (dCt) | 0.03±0.37<br>NS         | 0.18±0.47<br>NS          |

Data are expressed as β-coefficients (with standard errors) from linear regression models in which blood pressure (BP) was the dependent variable and delta cycle thresholds (dCt) (inverse measure of renin mRNA expression) as one of the independent variables. NS, not statistically significant.

was used as an internal reference transcript for renal mRNA expression and RNA U6 small nuclear 2 (*RNU6B*) for miRNA expression in the kidney; both were chosen based on previously published data. (8) In serum, the spike-in cel-miR-39 was used to normalize experimental variability in miRNA levels, in agreement with previously published studies (9-12). All expression experiments were run in duplicate (TRANSLATE) or triplicate (GRAPHIC). The delta cycle threshold (dCt), derived from normalization of mRNA and miRNAs to reference mRNAs, was used as qPCR measure of renal expression (13). dCt is an inverse measure of mRNA expression – the higher the value, the lower the abundance of the target examined in the tissue.

### Renal *In Situ* Hybridization (ISH) and Immunohistochemistry

Formalin-fixed and paraffin-embedded (FFPE) kidney samples from a TRANSLATE individual were used to localize the expression of miR-181a (by ISH) and renin (by immunohistochemistry). ISH was performed using locked nucleic acid (LNA) probes (Exiqon, 20-50 nM) for miR-181a, positive control miRNA (miR-126) and a scrambled (negative control) probe (Supplemental Table S2), as described previously (13). Immunohistochemistry was performed using a renin mouse monoclonal antibody (clone 7D3-E3 at 2.5 μg/ml, ab134783, Abcam), followed by staining with EnVision+System-HRP (Dako). In immunohistochemistry images, the posi-

**Supplementary Table S6.** Pathways associated with renal expression of miR-181a – gene-set enrichment analysis of TCGA kidney transcriptomes characterized by next-generation RNA-sequencing.

| Network label | Pathway database and name                                                                                                | Up- or down-regulated | FDR q-value | Genes in pathway | URL                                                                                                                                                                                                                                                                                                                                                             |
|---------------|--------------------------------------------------------------------------------------------------------------------------|-----------------------|-------------|------------------|-----------------------------------------------------------------------------------------------------------------------------------------------------------------------------------------------------------------------------------------------------------------------------------------------------------------------------------------------------------------|
| B1            | BioCarta complement pathway                                                                                              | Up                    | 0.0074      | 16               | <a href="http://www.broadinstitute.org/gsea/msigdb/cards/BIOCARTA_COMP_PATHWAY">http://www.broadinstitute.org/gsea/msigdb/cards/BIOCARTA_COMP_PATHWAY</a>                                                                                                                                                                                                       |
| B2            | BioCarta CSK pathway                                                                                                     | Up                    | 0.001       | 20               | <a href="http://www.broadinstitute.org/gsea/msigdb/cards/BIOCARTA_CSK_PATHWAY">http://www.broadinstitute.org/gsea/msigdb/cards/BIOCARTA_CSK_PATHWAY</a>                                                                                                                                                                                                         |
| B3            | BioCarta NK pathway                                                                                                      | Up                    | <0.0001     | 18               | <a href="http://www.broadinstitute.org/gsea/msigdb/cards/BIOCARTA_NK_PATHWAY">http://www.broadinstitute.org/gsea/msigdb/cards/BIOCARTA_NK_PATHWAY</a>                                                                                                                                                                                                           |
| K1            | KEGG arginine and proline metabolism                                                                                     | down                  | 0.0037      | 50               | <a href="http://www.broadinstitute.org/gsea/msigdb/cards/KEGG_ARGININE_AND_PROLINE_METABOLISM">http://www.broadinstitute.org/gsea/msigdb/cards/KEGG_ARGININE_AND_PROLINE_METABOLISM</a>                                                                                                                                                                         |
| K2            | KEGG oxidative phosphorylation                                                                                           | down                  | <0.0001     | 111              | <a href="http://www.broadinstitute.org/gsea/msigdb/cards/KEGG_OXIDATIVE_PHOSPHORYLATION">http://www.broadinstitute.org/gsea/msigdb/cards/KEGG_OXIDATIVE_PHOSPHORYLATION</a>                                                                                                                                                                                     |
| K3            | KEGG peroxisome                                                                                                          | down                  | 0.0005      | 75               | <a href="http://www.broadinstitute.org/gsea/msigdb/cards/KEGG_PEROXISOME">http://www.broadinstitute.org/gsea/msigdb/cards/KEGG_PEROXISOME</a>                                                                                                                                                                                                                   |
| K4            | KEGG allograft rejection                                                                                                 | Up                    | 0.001       | 24               | <a href="http://www.broadinstitute.org/gsea/msigdb/cards/KEGG_ALLOGRAFT_REJECTION">http://www.broadinstitute.org/gsea/msigdb/cards/KEGG_ALLOGRAFT_REJECTION</a>                                                                                                                                                                                                 |
| K5            | KEGG antigen processing and presentation                                                                                 | Up                    | 0.0074      | 54               | <a href="http://www.broadinstitute.org/gsea/msigdb/cards/KEGG_ANTIGEN_PROCESSING_AND_PRESENTATION">http://www.broadinstitute.org/gsea/msigdb/cards/KEGG_ANTIGEN_PROCESSING_AND_PRESENTATION</a>                                                                                                                                                                 |
| K6            | KEGG asthma                                                                                                              | Up                    | 0.001       | 17               | <a href="http://www.broadinstitute.org/gsea/msigdb/cards/KEGG_ASTHMA">http://www.broadinstitute.org/gsea/msigdb/cards/KEGG_ASTHMA</a>                                                                                                                                                                                                                           |
| K7            | KEGG autoimmune thyroid disease                                                                                          | Up                    | 0.0041      | 25               | <a href="http://www.broadinstitute.org/gsea/msigdb/cards/KEGG_AUTOIMMUNE_THYROID_DISEASE">http://www.broadinstitute.org/gsea/msigdb/cards/KEGG_AUTOIMMUNE_THYROID_DISEASE</a>                                                                                                                                                                                   |
| K8            | KEGG cell adhesion molecules CAMs                                                                                        | Up                    | 0.0002      | 112              | <a href="http://www.broadinstitute.org/gsea/msigdb/cards/KEGG_CELL_ADHESION_MOLECULES_CAMS">http://www.broadinstitute.org/gsea/msigdb/cards/KEGG_CELL_ADHESION_MOLECULES_CAMS</a>                                                                                                                                                                               |
| K9            | KEGG chemokine signaling pathway                                                                                         | Up                    | 0.0021      | 158              | <a href="http://www.broadinstitute.org/gsea/msigdb/cards/KEGG_CHEMOKINE_SIGNALING_PATHWAY">http://www.broadinstitute.org/gsea/msigdb/cards/KEGG_CHEMOKINE_SIGNALING_PATHWAY</a>                                                                                                                                                                                 |
| K10           | KEGG cytokine cytokine receptor interaction                                                                              | Up                    | <0.0001     | 168              | <a href="http://www.broadinstitute.org/gsea/msigdb/cards/KEGG_CYTOKINE_CYTOKINE_RECEPTOR_INTERACTION">http://www.broadinstitute.org/gsea/msigdb/cards/KEGG_CYTOKINE_CYTOKINE_RECEPTOR_INTERACTION</a>                                                                                                                                                           |
| K11           | KEGG ECM receptor interaction                                                                                            | Up                    | <0.0001     | 73               | <a href="http://www.broadinstitute.org/gsea/msigdb/cards/KEGG_ECM_RECEPTOR_INTERACTION">http://www.broadinstitute.org/gsea/msigdb/cards/KEGG_ECM_RECEPTOR_INTERACTION</a>                                                                                                                                                                                       |
| K12           | KEGG focal adhesion                                                                                                      | Up                    | 0.0009      | 178              | <a href="http://www.broadinstitute.org/gsea/msigdb/cards/KEGG_FOCAL_ADHESION">http://www.broadinstitute.org/gsea/msigdb/cards/KEGG_FOCAL_ADHESION</a>                                                                                                                                                                                                           |
| K13           | KEGG graft versus host disease                                                                                           | Up                    | 0.0009      | 25               | <a href="http://www.broadinstitute.org/gsea/msigdb/cards/KEGG_GRAFT_VERSUS_HOST_DISEASE">http://www.broadinstitute.org/gsea/msigdb/cards/KEGG_GRAFT_VERSUS_HOST_DISEASE</a>                                                                                                                                                                                     |
| K14           | KEGG hematopoietic cell lineage                                                                                          | Up                    | <0.0001     | 63               | <a href="http://www.broadinstitute.org/gsea/msigdb/cards/KEGG_HEMATOPOIETIC_CELL_LINEAGE">http://www.broadinstitute.org/gsea/msigdb/cards/KEGG_HEMATOPOIETIC_CELL_LINEAGE</a>                                                                                                                                                                                   |
| K15           | KEGG intestinal immune network for IGA production                                                                        | Up                    | 0.0002      | 32               | <a href="http://www.broadinstitute.org/gsea/msigdb/cards/KEGG_INTESTINAL_IMMUNE_NETWORK_FOR_IGA_PRODUCTION">http://www.broadinstitute.org/gsea/msigdb/cards/KEGG_INTESTINAL_IMMUNE_NETWORK_FOR_IGA_PRODUCTION</a>                                                                                                                                               |
| K16           | KEGG leishmania infection                                                                                                | Up                    | <0.0001     | 63               | <a href="http://www.broadinstitute.org/gsea/msigdb/cards/KEGG_LEISHMANIA_INFECTION">http://www.broadinstitute.org/gsea/msigdb/cards/KEGG_LEISHMANIA_INFECTION</a>                                                                                                                                                                                               |
| K17           | KEGG leukocyte transendothelial migration                                                                                | Up                    | 0.0049      | 99               | <a href="http://www.broadinstitute.org/gsea/msigdb/cards/KEGG_LEUKOCYTE_TRANSENDOHELIAL_MIGRATION">http://www.broadinstitute.org/gsea/msigdb/cards/KEGG_LEUKOCYTE_TRANSENDOHELIAL_MIGRATION</a>                                                                                                                                                                 |
| K18           | KEGG natural killer cell mediated cytotoxicity                                                                           | Up                    | 0.0009      | 91               | <a href="http://www.broadinstitute.org/gsea/msigdb/cards/KEGG_NATURAL_KILLER_CELL_MEDIATED_CYTOTOXICITY">http://www.broadinstitute.org/gsea/msigdb/cards/KEGG_NATURAL_KILLER_CELL_MEDIATED_CYTOTOXICITY</a>                                                                                                                                                     |
| K19           | KEGG primary immunodeficiency                                                                                            | Up                    | 0.001       | 26               | <a href="http://www.broadinstitute.org/gsea/msigdb/cards/KEGG_PRIMARY_IMMUNODEFICIENCY">http://www.broadinstitute.org/gsea/msigdb/cards/KEGG_PRIMARY_IMMUNODEFICIENCY</a>                                                                                                                                                                                       |
| K20           | KEGG systemic lupus erythematosus                                                                                        | Up                    | 0.0015      | 71               | <a href="http://www.broadinstitute.org/gsea/msigdb/cards/KEGG_SYSTEMIC_LUPUS_ERYTHEMATOSUS">http://www.broadinstitute.org/gsea/msigdb/cards/KEGG_SYSTEMIC_LUPUS_ERYTHEMATOSUS</a>                                                                                                                                                                               |
| K21           | KEGG TGF beta signaling pathway                                                                                          | Up                    | 0.0015      | 75               | <a href="http://www.broadinstitute.org/gsea/msigdb/cards/KEGG_TGF_BETA_SIGNALING_PATHWAY">http://www.broadinstitute.org/gsea/msigdb/cards/KEGG_TGF_BETA_SIGNALING_PATHWAY</a>                                                                                                                                                                                   |
| K22           | KEGG toll like receptor signaling pathway                                                                                | Up                    | 0.0036      | 81               | <a href="http://www.broadinstitute.org/gsea/msigdb/cards/KEGG_TOLL_LIKE_RECEPTOR_SIGNALING_PATHWAY">http://www.broadinstitute.org/gsea/msigdb/cards/KEGG_TOLL_LIKE_RECEPTOR_SIGNALING_PATHWAY</a>                                                                                                                                                               |
| K23           | KEGG type 1 diabetes mellitus                                                                                            | Up                    | 0.0024      | 29               | <a href="http://www.broadinstitute.org/gsea/msigdb/cards/KEGG_TYPE_1_DIABETES_MELLITUS">http://www.broadinstitute.org/gsea/msigdb/cards/KEGG_TYPE_1_DIABETES_MELLITUS</a>                                                                                                                                                                                       |
| K24           | KEGG viral myocarditis                                                                                                   | Up                    | 0.0021      | 57               | <a href="http://www.broadinstitute.org/gsea/msigdb/cards/KEGG_VIRAL_MYOCARDITIS">http://www.broadinstitute.org/gsea/msigdb/cards/KEGG_VIRAL_MYOCARDITIS</a>                                                                                                                                                                                                     |
| R1            | Reactome respiratory electron transport                                                                                  | down                  | <0.0001     | 63               | <a href="http://www.broadinstitute.org/gsea/msigdb/cards/REACTOME_RESPIRATORY_ELECTRON_TRANSPORT">http://www.broadinstitute.org/gsea/msigdb/cards/REACTOME_RESPIRATORY_ELECTRON_TRANSPORT</a>                                                                                                                                                                   |
| R2            | Reactome respiratory electron transport ATP synthesis by chemosmotic coupling and heat production by uncoupling proteins | down                  | <0.0001     | 78               | <a href="http://www.broadinstitute.org/gsea/msigdb/cards/REACTOME_RESPIRATORY_ELECTRON_TRANSPORT_ATP_SYNTHESIS_BY_CHEMOSMOTIC_COUPLING_AND_HEAT_PRODUCTION_BY_UNCOUPLING_PROTEINS">http://www.broadinstitute.org/gsea/msigdb/cards/REACTOME_RESPIRATORY_ELECTRON_TRANSPORT_ATP_SYNTHESIS_BY_CHEMOSMOTIC_COUPLING_AND_HEAT_PRODUCTION_BY_UNCOUPLING_PROTEINS</a> |
| R3            | Reactome TCA cycle and respiratory electron transport                                                                    | down                  | 0.0006      | 114              | <a href="http://www.broadinstitute.org/gsea/msigdb/cards/REACTOME_TCA_CYCLE_AND_RESPIRATORY_ELECTRON_TRANSPORT">http://www.broadinstitute.org/gsea/msigdb/cards/REACTOME_TCA_CYCLE_AND_RESPIRATORY_ELECTRON_TRANSPORT</a>                                                                                                                                       |
| R4            | Reactome cell surface interactions of the vascular wall                                                                  | Up                    | 0.001       | 78               | <a href="http://www.broadinstitute.org/gsea/msigdb/cards/REACTOME_CELL_SURFACE_INTERACTIONS_AT_THE_VASCULAR_WALL">http://www.broadinstitute.org/gsea/msigdb/cards/REACTOME_CELL_SURFACE_INTERACTIONS_AT_THE_VASCULAR_WALL</a>                                                                                                                                   |
| R5            | Reactome chemokine receptors bind chemokines                                                                             | Up                    | <0.0001     | 40               | <a href="http://www.broadinstitute.org/gsea/msigdb/cards/REACTOME_CHEMOKINE_RECEPTORS_BIND_CHEMOKINES">http://www.broadinstitute.org/gsea/msigdb/cards/REACTOME_CHEMOKINE_RECEPTORS_BIND_CHEMOKINES</a>                                                                                                                                                         |
| R6            | Reactome class A 1 rhodopsin like receptors                                                                              | Up                    | 0.0021      | 141              | <a href="http://www.broadinstitute.org/gsea/msigdb/cards/REACTOME_CLASS_A_1_RHODOPSIN_LIKE_RECEPTORS">http://www.broadinstitute.org/gsea/msigdb/cards/REACTOME_CLASS_A_1_RHODOPSIN_LIKE_RECEPTORS</a>                                                                                                                                                           |
| R7            | Reactome collagen formation                                                                                              | Up                    | 0.0024      | 49               | <a href="http://www.broadinstitute.org/gsea/msigdb/cards/REACTOME_COLLAGEN_FORMATION">http://www.broadinstitute.org/gsea/msigdb/cards/REACTOME_COLLAGEN_FORMATION</a>                                                                                                                                                                                           |
| R8            | Reactome costimulation by the CD28 family                                                                                | Up                    | 0.0034      | 56               | <a href="http://www.broadinstitute.org/gsea/msigdb/cards/REACTOME_COSTIMULATION_BY_THE_CD28_FAMILY">http://www.broadinstitute.org/gsea/msigdb/cards/REACTOME_COSTIMULATION_BY_THE_CD28_FAMILY</a>                                                                                                                                                               |
| R9            | Reactome cytokine signaling in immune system                                                                             | Up                    | <0.0001     | 233              | <a href="http://www.broadinstitute.org/gsea/msigdb/cards/REACTOME_CYTOKINE_SIGNALING_IN_IMMUNE_SYSTEM">http://www.broadinstitute.org/gsea/msigdb/cards/REACTOME_CYTOKINE_SIGNALING_IN_IMMUNE_SYSTEM</a>                                                                                                                                                         |
| R10           | Reactome downstream TCR signaling                                                                                        | Up                    | 0.0062      | 32               | <a href="http://www.broadinstitute.org/gsea/msigdb/cards/REACTOME_DOWNSTREAM_TCR_SIGNALING">http://www.broadinstitute.org/gsea/msigdb/cards/REACTOME_DOWNSTREAM_TCR_SIGNALING</a>                                                                                                                                                                               |
| R11           | Reactome extracellular matrix organization                                                                               | Up                    | 0.0002      | 66               | <a href="http://www.broadinstitute.org/gsea/msigdb/cards/REACTOME_EXTRACELLULAR_MATRIX_ORGANIZATION">http://www.broadinstitute.org/gsea/msigdb/cards/REACTOME_EXTRACELLULAR_MATRIX_ORGANIZATION</a>                                                                                                                                                             |
| R12           | Reactome generation of second messenger molecules                                                                        | Up                    | <0.0001     | 24               | <a href="http://www.broadinstitute.org/gsea/msigdb/cards/REACTOME_GENERATION_OF_SECOND_MESSENGER_MOLECULES">http://www.broadinstitute.org/gsea/msigdb/cards/REACTOME_GENERATION_OF_SECOND_MESSENGER_MOLECULES</a>                                                                                                                                               |
| R13           | Reactome gpcr ligand binding                                                                                             | Up                    | 0.0097      | 200              | <a href="http://www.broadinstitute.org/gsea/msigdb/cards/REACTOME_GPCR_LIGAND_BINDING">http://www.broadinstitute.org/gsea/msigdb/cards/REACTOME_GPCR_LIGAND_BINDING</a>                                                                                                                                                                                         |
| R14           | Reactome GPM mediated activation cascade                                                                                 | Up                    | 0.0067      | 30               | <a href="http://www.broadinstitute.org/gsea/msigdb/cards/REACTOME_GPM_MEDIATED_ACTIVATION_CASCADE">http://www.broadinstitute.org/gsea/msigdb/cards/REACTOME_GPM_MEDIATED_ACTIVATION_CASCADE</a>                                                                                                                                                                 |
| R15           | Reactome immunoregulatory interactions between a lymphoid and a non-lymphoid cell                                        | Up                    | <0.0001     | 45               | <a href="http://www.broadinstitute.org/gsea/msigdb/cards/REACTOME_IMMUNOREGULATORY_INTERACTIONS_BETWEEN_A_LYMPHOID_AND_A_NON_LYMPHOID_CELL">http://www.broadinstitute.org/gsea/msigdb/cards/REACTOME_IMMUNOREGULATORY_INTERACTIONS_BETWEEN_A_LYMPHOID_AND_A_NON_LYMPHOID_CELL</a>                                                                               |
| R16           | Reactome innate immune system                                                                                            | Up                    | 0.0021      | 194              | <a href="http://www.broadinstitute.org/gsea/msigdb/cards/REACTOME_INNATE_IMMUNE_SYSTEM">http://www.broadinstitute.org/gsea/msigdb/cards/REACTOME_INNATE_IMMUNE_SYSTEM</a>                                                                                                                                                                                       |
| R17           | Reactome integrin cell surface interactions                                                                              | Up                    | <0.0001     | 74               | <a href="http://www.broadinstitute.org/gsea/msigdb/cards/REACTOME_INTEGRIN_CELL_SURFACE_INTERACTIONS">http://www.broadinstitute.org/gsea/msigdb/cards/REACTOME_INTEGRIN_CELL_SURFACE_INTERACTIONS</a>                                                                                                                                                           |
| R18           | Reactome interferon alpha beta signaling                                                                                 | Up                    | 0.0008      | 48               | <a href="http://www.broadinstitute.org/gsea/msigdb/cards/REACTOME_INTERFERON_ALPHA_BETA_SIGNALING">http://www.broadinstitute.org/gsea/msigdb/cards/REACTOME_INTERFERON_ALPHA_BETA_SIGNALING</a>                                                                                                                                                                 |
| R19           | Reactome interferon gamma signaling                                                                                      | Up                    | 0.0009      | 55               | <a href="http://www.broadinstitute.org/gsea/msigdb/cards/REACTOME_INTERFERON_GAMMA_SIGNALING">http://www.broadinstitute.org/gsea/msigdb/cards/REACTOME_INTERFERON_GAMMA_SIGNALING</a>                                                                                                                                                                           |
| R20           | Reactome interferon signaling                                                                                            | Up                    | 0.0001      | 136              | <a href="http://www.broadinstitute.org/gsea/msigdb/cards/REACTOME_INTERFERON_SIGNALING">http://www.broadinstitute.org/gsea/msigdb/cards/REACTOME_INTERFERON_SIGNALING</a>                                                                                                                                                                                       |
| R21           | Reactome PD1 signaling                                                                                                   | Up                    | 0.001       | 17               | <a href="http://www.broadinstitute.org/gsea/msigdb/cards/REACTOME_PD1_SIGNALING">http://www.broadinstitute.org/gsea/msigdb/cards/REACTOME_PD1_SIGNALING</a>                                                                                                                                                                                                     |
| R22           | Reactome peptide ligand binding receptors                                                                                | Up                    | 0.002       | 91               | <a href="http://www.broadinstitute.org/gsea/msigdb/cards/REACTOME_PEPTIDE_LIGAND_BINDING_RECEPTORS">http://www.broadinstitute.org/gsea/msigdb/cards/REACTOME_PEPTIDE_LIGAND_BINDING_RECEPTORS</a>                                                                                                                                                               |
| R23           | Reactome phosphorylation of CD3 and TCR zeta chains                                                                      | Up                    | 0.0001      | 15               | <a href="http://www.broadinstitute.org/gsea/msigdb/cards/REACTOME_PHOSPHORYLATION_OF_CD3_AND_TCR_ZETA_CHAINS">http://www.broadinstitute.org/gsea/msigdb/cards/REACTOME_PHOSPHORYLATION_OF_CD3_AND_TCR_ZETA_CHAINS</a>                                                                                                                                           |
| R24           | Reactome signaling by IIS                                                                                                | Up                    | 0.001       | 97               | <a href="http://www.broadinstitute.org/gsea/msigdb/cards/REACTOME_SIGNALING_BY_IIS">http://www.broadinstitute.org/gsea/msigdb/cards/REACTOME_SIGNALING_BY_IIS</a>                                                                                                                                                                                               |
| R25           | Reactome TCR signaling                                                                                                   | Up                    | <0.0001     | 47               | <a href="http://www.broadinstitute.org/gsea/msigdb/cards/REACTOME_TCR_SIGNALING">http://www.broadinstitute.org/gsea/msigdb/cards/REACTOME_TCR_SIGNALING</a>                                                                                                                                                                                                     |
| R26           | Reactome toll receptor cascades                                                                                          | Up                    | 0.0042      | 108              | <a href="http://www.broadinstitute.org/gsea/msigdb/cards/REACTOME_TOLL_RECEPTOR_CASCADES">http://www.broadinstitute.org/gsea/msigdb/cards/REACTOME_TOLL_RECEPTOR_CASCADES</a>                                                                                                                                                                                   |

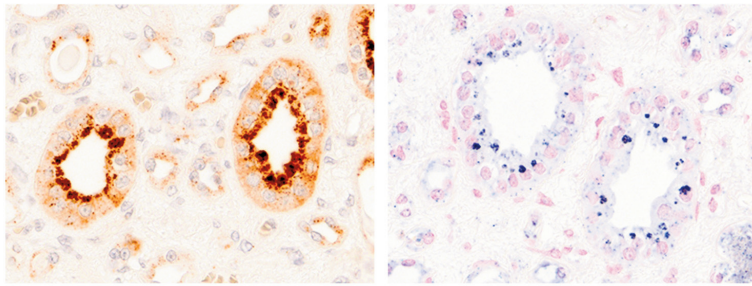

**Supplementary Figure S1.** Expression of renin (left; red staining) and miR-181a (right; blue staining) in the distal collecting duct. Staining is predominant within the luminal pole of the epithelial cells of the collecting duct (magnification, 400x).

tive staining (renin) was brown, while the counterstain was haematoxylin (blue staining). For ISH, the positive staining was blue while the counterstain was nuclear fast red (red staining). Both ISH and immunohistochemistry were conducted by Bioneer A/S (Denmark). Images were acquired directly from the slides by digital photography using a Nikon Eclipse E800 microscope with 100x, 200x and 400x magnification.

### Biochemical Analysis

Serum renin levels were measured by immunoradiometric assay (Renin III, Cisbio, Gif-sur-Yvette) in 192 TRANSLATE subjects from whom both serum sample and kidney tissue samples were available.

### Statistical Analysis

In the TRANSLATE Study, distributions of all mRNA expression measurements and biochemical data were examined using the Skewness and Kurtosis test prior to further analysis. Serum renin was non-normally distributed, and was therefore logarithmically transformed to achieve a normal distribution. Unadjusted association analysis between two quantitative phenotypes was explored first by Pearson's linear correlation. Further analyses were conducted using step-wise multiple linear regression models with clinical (age, sex, body mass index, recruitment centre) and experimental (cDNA or qPCR plate) variables as independent parameters (crite-

ria of F-entry probability: 0.15, removal: 0.20). Additional biochemical (serum levels of renin) or molecular (renal expression of renin mRNA) parameters were included in the models where appropriate. Three types of sensitivity analysis were used after analysis of association between gene expression or biochemical phenotypes and BP values. In the first type of sensitivity analysis, BP from patients receiving antihypertensive medication were corrected for the BP lowering effect of medications by adding a constant of 15 mmHg and 10 mmHg to the systolic BP (SBP) and diastolic BP (DBP) measurements, respectively, in line with the algorithms used before (14). The second sensitivity analysis was based on exclusion of all subjects on antihypertensive therapy. The third sensitivity analysis included only individuals with clinic SBP  $\leq$  140 mmHg and DBP  $\leq$  90 mmHg, who were not taking antihypertensive medication.

In the GRAPHIC Study, data were first checked to ensure that assumptions for multiple regression analyses were met. Multiple linear regression analyses were performed using clinic SBP or clinic DBP as the dependent variable and miR-181a dCt, age, body mass index and sex as independent variables.

Results obtained at the  $P < 0.05$  level were considered statistically significant. Statistical package SPSS for Windows (Release 21.0 for TRANSLATE and 20.0 for GRAPHIC) was used for the statistical analyses.

### Pathway Analysis of Human Kidney Transcriptomes Characterized by Next-Generation RNA-Sequencing

Next-generation RNA-sequencing and small RNA-sequencing raw data (level 1) from kidney tissue unaffected by cancer (labeled as "normal-matched") collected from 69 individuals with clear cell renal carcinoma were downloaded from The Cancer Genome Atlas (TCGA) database (<http://tcga-data.nci.nih.gov>) in April 2014 (application 26966-1 approved by TCGA Data Access Committee). Raw 50 base pair reads were first aligned to the GRCh37 reference genome (as used by Ensembl release 70) using the TopHat programme (15). On average, 68 million paired-end reads per sample were aligned successfully. Expression values were calculated for all Ensembl transcripts and genes using Cufflinks and Cuffdiff software (16). The final expression values were computed in  $\log_2\text{TPM}+1$  (TPM: transcripts per million) units as described in previous studies (17, 18). Technical variation between the samples was accounted for by normalization based on probabilistic estimation of expression residuals (PEER) (19, 20). Analysis of association between miR-181a and mRNAs was conducted using Limma (21), with each mRNA expression value as the response variable and miR-181a expression, age and sex as independent parameters included in the regression model.

To identify renal pathways associated with expression of miR-181a, we used gene-set enrichment analysis (22) (in pre-ranked mode) with Kyoto Encyclopedia of Genes and Genomes (KEGG), BioCarta and Reactome as pathway repositories. The t-statistics generated were averaged by gene. The pathway overlap, and therefore edge width, was calculated using the overlap coefficient. The resultant pathway network was visualized using Gephi (23) and annotated manually to highlight clusters of pathways with similar functions. Correction for multiple testing in both individual mRNA- and pathway-based analyses was conducted by calculation of false discovery rate q-values and the cor-

rected threshold for statistical significance was set at  $q < 0.01$ .

### Hierarchical Clustering of Multidimensional Scaling of Renal Transcriptomes Characterized by Next-Generation RNA-Sequencing

To exclude the potential effect of co-existent cancer on the transcriptome of the tumour-affected renal tissue from where the specimen was sampled, we compared global expression profiles of healthy tissue from nephrectomies due to cancer with those from non-cancer kidneys and clear cell renal carcinoma. The RNA-sequencing data were collected from three sources: TCGA (69 normal-matched and 10 randomly chosen renal cancer samples), Genotype-Tissue Expression (GTEx) Project (24) (8 non-cancer kidneys harvested from donors identified through low post-mortem interval) and TRANSLATE P Study (where 32 kidneys underwent next-generation RNA-sequencing).

**RNA-sequencing sample preparation and quality control – TRANSLATE Study.** Approximately 30 milligrams of tissue was mechanically homogenized (PowerGen™ Model 125 Homogenizer) in Qiagen RTL buffer. RNA extraction was conducted using RNeasy Mini kit (Qiagen) according to the supplier's guidelines. Eluted RNA samples were assessed for concentration using a Nanodrop 8-sample spectrophotometer ND-800 prior to further processing. RNA sequencing libraries were prepared using a non-strand-specific Illumina TruSeq v2 kit and 1  $\mu$ g of poly-A selected input RNA at the Australian Genome Research Facility (AGRF). Libraries were sequenced on an Illumina HiSeq 2000 using 100 base pair paired-end reads, producing an average of ~52 million reads per sample. Raw reads were checked for quality using FastQC (<http://www.bioinformatics.babraham.ac.uk/projects/fastqc/>). Post-alignment, the squared coefficient of variation and expression dispersion estimates were assessed using CummeRBund (25).

**RNA-sequencing data processing – GTEx Project.** GTEx samples were pre-

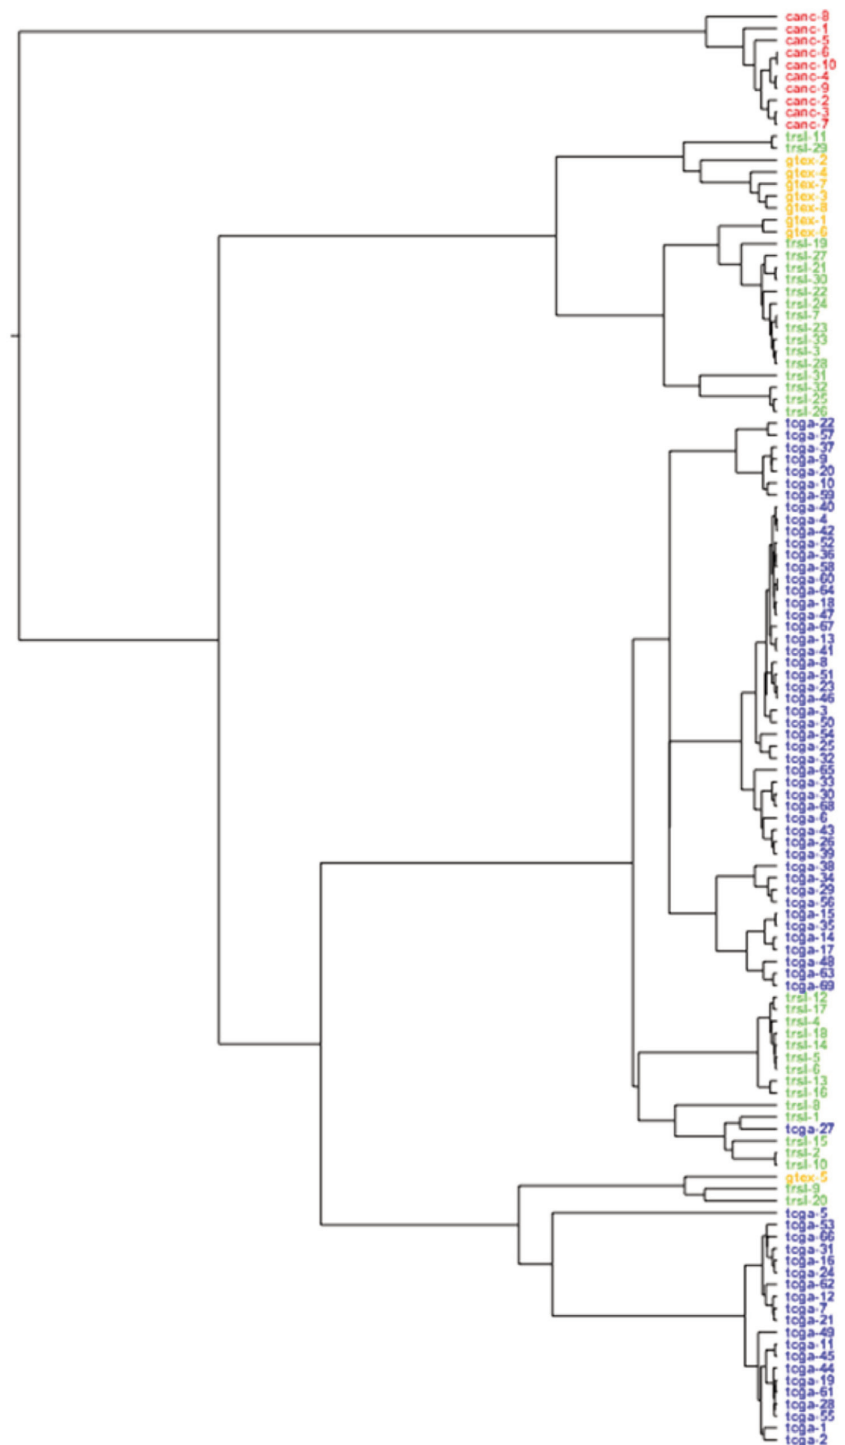

**Supplementary Figure S2.** Hierarchical clustering of renal transcriptomes characterized by next-generation RNA-sequencing. The expression values for 12551 commonly expressed mRNAs were represented in three dimensions via classical multidimensional scaling (MDS) and then clustered into a hierarchical structure from a pairwise Euclidean distance matrix. The horizontal axis represents Euclidean distance between samples in the three MDS dimensions. Blue, the Cancer Genome Atlas (TCGA) "normal-matched" samples; green, TRANSLATE samples from tissue unaffected by cancer; orange, Genotype-Tissue Expression (GTEx) non-cancer renal samples; red, TCGA renal cancer samples.

pared and sequenced using a protocol very similar to the TRANSLATE Study. All libraries were poly-A selected and non-strand specific and were sequenced on an Illumina HiSeq 2000 using 76 bp paired-end reads giving approximately 50 million reads per sample. The latest details of the GTEx data and their analysis methods can be found in their online documentation (<http://www.gtexportal.org/home/documentationPage>) and in the published literature (24, 26).

**Data processing and multidimensional scaling analysis.** Expression values were calculated as  $\log_2$  read counts per million (CPM) for all genes expressed above 20 CPM in more than 50% of samples from any group. Read counts were provided by Cufflinks (16) except for the GTEx samples, which were downloaded from the GTEx portal (<http://www.gtexportal.org/home/>). Normalization, CPM calculation and multidimensional scaling of the data into three dimensions was performed by edgeR (27). Hierarchical clustering of multidimensional scaling dimension values and distance matrix calculation was performed by R (28) and visualized using FigTree v1.4.2 (29).

## REFERENCES

- Tomaszewski M, Eales J, Denniff M, Myers S, Chew GS, Nelson CP, et al. (2015) Renal mechanisms of association between FGF1 and blood pressure. *J Am Soc Nephrol*. Published Online First: 27<sup>th</sup> April, 2015; doi: 10.1681/ASN.2014121211
- Tomaszewski M, Charchar FJ, Lynch MD, Padmanabhan S, Wang WY, Miller WH, et al. (2007) Fibroblast growth factor 1 gene and hypertension: from the quantitative trait locus to positional analysis. *Circulation*. 116:1915-24.
- Tomaszewski M, Charchar FJ, Nelson CP, Barnes T, Denniff M, Kaiser M, et al. (2011) Pathway analysis shows association between FGF1 and hypertension. *J Am Soc Nephrol*. 22:947-55.
- Tomaszewski M, Brain NJ, Charchar FJ, Wang WY, Lacka B, Padmanabhan S, et al. (2002) Essential hypertension and  $\beta_2$ -adrenergic receptor gene: linkage and association analysis. *Hypertension*. 40:286-91.
- Tomaszewski M, Charchar FJ, Lacka B, Pesonen U, Wang WY, Zukowska-Szczechowska E, et al. (2004) Epistatic interaction between  $\beta_2$ -adrenergic receptor and neuropeptide Y genes influences LDL-cholesterol in hypertension. *Hypertension*. 44:689-94.
- Tobin MD, Tomaszewski M, Braund PS, Hajat C, Raleigh SM, Palmer TM, et al. (2008) Common variants in genes underlying monogenic hypertension and hypotension and blood pressure in the general population. *Hypertension*. 51:1658-64.
- Tomaszewski M, Debiec R, Braund PS, Nelson CP, Hardwick R, Christofidou P, et al. (2010) Genetic architecture of ambulatory blood pressure in the general population: insights from cardiovascular gene-centric array. *Hypertension*. 56:1069-76.
- Marques FZ, Campain AE, Tomaszewski M, Zukowska-Szczechowska E, Yang YH, Charchar FJ, et al. (2011) Gene expression profiling reveals renin mRNA overexpression in human hypertensive kidneys and a role for microRNAs. *Hypertension*. 58:1093-8.
- Lorenzen JM, Thum T. (2012) Circulating and urinary microRNAs in kidney disease. *Clin J Am Soc Nephrol*. 7:1528-33.
- Brase JC, Wuttig D, Kuner R, Sultmann H. (2010) Serum microRNAs as non-invasive biomarkers for cancer. *Mol Cancer*. 9:306.
- Kuner R, Brase JC, Sultmann H, Wuttig D. (2013) microRNA biomarkers in body fluids of prostate cancer patients. *Methods*. 59:132-7.
- Li Y, Kowdley KV. (2012) Method for microRNA isolation from clinical serum samples. *Anal Biochem*. 431:69-75.
- Schmittgen TD, Livak KJ. (2008) Analyzing real-time PCR data by the comparative  $C_T$  method. *Nat Protoc*. 3:1101-8.
- Ehret GB, Caulfield MJ. (2013) Genes for blood pressure: an opportunity to understand hypertension. *Eur Heart J*. 34:951-61.
- Kim D, Pertea G, Trapnell C, Pimentel H, Kelley R, Salzberg SL. (2013) TopHat2: accurate alignment of transcriptomes in the presence of insertions, deletions and gene fusions. *Genome Biol*. 14:R36.
- Trapnell C, Hendrickson DG, Sauvageau M, Goff L, Rinn JL, Pachter L. (2013) Differential analysis of gene regulation at transcript resolution with RNA-seq. *Nat Biotechnol*. 31:46-53.
- Li B, Dewey CN. (2011) RSEM: accurate transcript quantification from RNA-Seq data with or without a reference genome. *BMC Bioinformatics*. 12:323.
- Li B, Ruotti V, Stewart RM, Thomson JA, Dewey CN. (2010) RNA-Seq gene expression estimation with read mapping uncertainty. *Bioinformatics*. 26:493-500.
- Hoen PA, Friedlander MR, Almlöf J, Sammeth M, Pulyakhina I, Anvar SY, et al. (2013) Reproducibility of high-throughput mRNA and small RNA sequencing across laboratories. *Nat Biotechnol*. 31:1015-22.
- Stegle O, Parts L, Piipari M, Winn J, Durbin R. (2012) Using probabilistic estimation of expression residuals (PEER) to obtain increased power and interpretability of gene expression analyses. *Nat Protoc*. 7:500-7.
- Smyth GK. (c2005) limma: Linear Models for Microarray Data. In: *Bioinformatics and Computational Biology Solutions Using R and Bioconductor*. Gentleman R, Carey VJ, Huber W, Irizarry RA, Dudoit S (eds.) Springer, New York, pp. 397-420.
- Subramanian A, Tamayo P, Mootha VK, Mukherjee S, Ebert BL, Gillette MA, et al. (2005) Gene set enrichment analysis: a knowledge-based approach for interpreting genome-wide expression profiles. *Proc Natl Acad Sci USA*. 102:15545-50.
- Bastian M, Heymann S, Jacomy M, editors. Gephi : an open source software for exploring and manipulating networks. International AAAI Conference on Weblogs and Social Media; 2009.
- Lonsdale J, Thomas J, Salvatore M, Phillips R, Lo E, Shad S, et al. (2013) The Genotype-Tissue Expression (GTEx) project. *Nat Genet*. 45:580-5.
- Goff L, Trapnell C, Kelley D. CummeRbund: visualization and exploration of Cufflinks high-throughput sequencing data.: R package version 2.6.1.; 2012.
- DeLuca DS, Levin JZ, Sivachenko A, Fennell T, Nazaire MD, Williams C, et al. (2012) RNA-SeqQC: RNA-seq metrics for quality control and process optimization. *Bioinformatics*. 28:1530-2.
- Robinson MD, McCarthy DJ, Smyth GK. (2010) edgeR: a Bioconductor package for differential expression analysis of digital gene expression data. *Bioinformatics*. 26:139-40.
- R Core Team. (2014) R: A Language and Environment for Statistical Computing. Available: <http://www.R-project.org>.
- Rambaut A. (2014) FigTree v1.4.2. Available: <http://tree.bio.ed.ac.uk/software/figtree>.
